# Supplementary material for: Frequency of Physical Activity Done with a Companion: Changes Over Seven Years in Adults Aged 60+ Living in an Australian Capital City
Source: PubMed Central journal article supplement (PMC10478325; doi:10.1177/08982643231158424), 2023-02-28
Supplement: sj-pdf-1-jah-10.1177_08982643231158424.pdf [file sj-pdf-1-jah-10.1177_08982643231158424.pdf]

## Supplementary materials

**Table 1s**

*Akaike Information Criterion (AIC) values for Partner models*

| <b>Model</b> | <b>Fixed effects</b>                                | <b>Random Effect</b> | <b>df</b> | <b>AIC</b>  |
|--------------|-----------------------------------------------------|----------------------|-----------|-------------|
| 1            | wave                                                | participant          | 11        | 8855        |
| 2            | wave + sex                                          | participant          | 13        | 8724        |
| 3            | wave+ sex + health rating                           | participant          | 17        | 8705        |
| 4            | <b>wave + sex + health rating + education</b>       | <b>participant</b>   | <b>23</b> | <b>8690</b> |
| 5            | wave + sex + health rating + education + employment | participant          | 25        | 8708        |
| 6            | wave + health rating + education+ employment        | participant          | 23        | 8793        |

**Note:** A lower AIC value indicates better quality of fit relative to the complexity of the model; therefore, the model with the lowest AIC was selected

**Table 2s**

*Akaike Information Criterion (AIC) values for Family models*

| <b>Model</b> | <b>Fixed effects</b>                                                    | <b>Random Effect</b> | <b>df</b> | <b>AIC</b>  |
|--------------|-------------------------------------------------------------------------|----------------------|-----------|-------------|
| 1            | wave                                                                    | participant          | 11        | 6209        |
| 2            | wave + sex                                                              | participant          | 13        | 6174        |
| 3            | wave + sex + living arrangement                                         | participant          | 15        | 6140        |
| 4            | wave+ sex + living arrangement + health rating                          | participant          | 19        | 6120        |
| 5            | <b>wave+ sex + living arrangement + health rating + education</b>       | <b>participant</b>   | <b>25</b> | <b>6105</b> |
| 6            | wave+ sex + living arrangement + health rating + education + employment | participant          | 27        | 6106        |

**Note:** A lower AIC value indicates better quality of fit relative to the complexity of the model; therefore, the model with the lowest AIC was selected

**Table 3s***Akaike Information Criterion (AIC) values for Friend models*

| <b>Model</b> | <b>Fixed effects</b>      | <b>Random Effect</b> | <b>df</b> | <b>AIC</b>  |
|--------------|---------------------------|----------------------|-----------|-------------|
| <b>1</b>     | <b>wave</b>               | <b>participant</b>   | <b>11</b> | <b>6416</b> |
| <b>2</b>     | wave + sex                | participant          | 13        | 6706        |
| <b>3</b>     | wave + living arrangement | participant          | 13        | 6849        |
| <b>4</b>     | wave + education          | participant          | 17        | 6924        |
| <b>5</b>     | wave + employment         | participant          | 13        | 6433        |
| <b>6</b>     | wave + health rating      | participant          | 15        | 6734        |

**Note:** A lower AIC value indicates better quality of fit relative to the complexity of the model; therefore, the model with the lowest AIC was selected

**Table 4s***Akaike Information Criterion (AIC) values for Neighbor models*

| <b>Model</b> | <b>Fixed effects</b>                                | <b>Random Effect</b> | <b>df</b> | <b>AIC</b>  |
|--------------|-----------------------------------------------------|----------------------|-----------|-------------|
| <b>1</b>     | wave                                                | participant          | 11        | 3529        |
| <b>2</b>     | wave + sex                                          | participant          | 13        | 3529        |
| <b>3</b>     | wave + sex + living arrangement                     | participant          | 15        | 3537        |
| <b>4</b>     | wave + sex + education                              | participant          | 19        | 3505        |
| <b>5</b>     | wave + education                                    | participant          | 17        | 3514        |
| <b>6</b>     | <b>wave + sex + education + employment</b>          | <b>participant</b>   | <b>21</b> | <b>3478</b> |
| <b>7</b>     | Wave + sex + education + employment + health rating | participant          | 23        | 3487        |

**Note:** A lower AIC value indicates better quality of fit relative to the complexity of the model; therefore, the model with the lowest AIC was selected
